# Supplementary material for: Effectiveness and Safety of Bedaquiline-containing Regimens for Treatment on Patients With Refractory Rifampicin/multidrug-resistant Tuberculosis: A Retrospective Cohort Study in East China
Source: Research Square preprint supplement (doi:10.21203/rs.3.rs-833736/v1), 2021-08-30
Supplement: Supplementary file 2 [file a3c1d96f9daaea71950e4ae4.docx]

**Supplementary table. Baselines characteristics of all patients**

| Characteristics | Bedaquiline group (n=102) | Non-bedaquiline group (n=100) | *p* value |
| --- | --- | --- | --- |
| Age (years, median/IQR) | 37.0 (28.0-52.0) | 43.5 (29.0-54.0) | 0.080 |
| Gender (n, %), male/female | 78 (76.5)/24 (23.5) | 71 (71.0)/29 (29.0) | 0.766 |
| Cavitary disease at baseline (n, %) | 71 (73.2) | 73 (73.0) | 0.650 |
| Concomitant extra-pulmonary TB (n, %) | 20 (19.6) | 15 (15.0) | 0.387 |
| Concomitant diabetes (n, %) | 16 (15.7) | 13 (13.0) | 0.586 |
| History of TB treatment (n, %) |  |  | 0.850 |
| New cases | 9 (8.8) | 8 (8.1) |  |
| Previously treated cases | 93 (91.2) | 91 (91.9) |  |
| Type of drug resistance (n, %) |  |  | 0.667 |
| RR | 3 (2.9) | 5 (5.0) |  |
| MDR | 74 (72.5) | 68 (68.0) |  |
| XDR | 25 (24.5) | 27 (27.0) |  |

IQR, interquartile range; M, male; F, female; n, number; TB, tuberculosis; RR, rifampicin-resistant; MDR, multidrug-resistant; XDR, extensively drug-resistant
